# Supplementary material for: Increased Expression of 11β-Hydroxysteroid Dehydrogenase Type 1 Contributes to Epidermal Permeability Barrier Dysfunction in Aged Skin
Source: MDPI journal article supplement (doi:10.3390/ijms22115750), 2021-05-27
Supplement: s1 [file s1]

**Table S1.** *p*-values of the *post hoc* analysis presented in Figure 5a (stratum corneum corticosterone).

|                  | Mean $\pm$<br>SD         | KO aged<br>veh | WT aged<br>veh | WT aged<br>INHI | WT young<br>veh | WT young<br>INHI |
|------------------|--------------------------|----------------|----------------|-----------------|-----------------|------------------|
| KO aged<br>veh   | 3987.51 $\pm$<br>922.88  | N/A            | 0.069          | 0.320           | 0.827           | >0.999           |
| WT aged<br>veh   | 5461.94 $\pm$<br>1465.21 |                | N/A            | 0.008           | 0.022           | 0.151            |
| WT aged<br>INHI  | 3373.46 $\pm$<br>333.61  |                |                | N/A             | >0.999          | 0.548            |
| WT young<br>veh  | 4244.20 $\pm$<br>1741.36 |                |                |                 | N/A             | >0.999           |
| WT young<br>INHI | 4211.6 $\pm$<br>1297.88  |                |                |                 |                 | N/A              |

SD, standard deviation; KO, knock-out; WT, wild-type; INHI, 11 $\beta$ -HSD1 inhibitor; veh, vehicle; N/A, not applicable.

**Table S2.** *p*-values of the *post hoc* analysis presented in Figure 5b (corneodesmosome density).

|                  | Mean $\pm$<br>SD | KO aged<br>veh | WT aged<br>veh | WT aged<br>INHI | WT young<br>veh | WT young<br>INHI |
|------------------|------------------|----------------|----------------|-----------------|-----------------|------------------|
| KO aged<br>veh   | 2.39 $\pm$ 0.87  | N/A            | 0.033          | 0.202           | 0.281           | 0.097            |
| WT aged<br>veh   | 1.00 $\pm$ 0.15  |                | N/A            | 0.036           | 0.194           | 0.183            |
| WT aged<br>INHI  | 1.80 $\pm$ 0.72  |                |                | N/A             | 0.833           | 0.755            |
| WT young<br>veh  | 1.84 $\pm$ 1.08  |                |                |                 | N/A             | 0.955            |
| WT young<br>INHI | 1.63 $\pm$ 0.69  |                |                |                 |                 | N/A              |

SD, standard deviation; KO, knock-out; WT, wild-type; INHI, 11 $\beta$ -HSD1 inhibitor; veh, vehicle; N/A, not applicable.

**Table S3.** *p*-values of the *post hoc* analysis presented in Figure 6a (ceramides).

|                  | Mean $\pm$<br>SD      | KO aged<br>veh | WT aged<br>veh | WT aged<br>INHI | WT young<br>veh | WT young<br>INHI |
|------------------|-----------------------|----------------|----------------|-----------------|-----------------|------------------|
| KO aged<br>veh   | 234.96 $\pm$<br>42.03 | N/A            | 0.530          | 0.343           | 0.003           | 0.003            |
| WT aged<br>veh   | 212.77 $\pm$<br>27.75 |                | N/A            | 0.008           | 0.008           | 0.008            |
| WT aged<br>INHI  | 259.56 $\pm$<br>10.78 |                |                | N/A             | 0.008           | 0.008            |
| WT young<br>veh  | 363.26 $\pm$<br>42.52 |                |                |                 | N/A             | 0.056            |
| WT young<br>INHI | 442.53 $\pm$<br>52.31 |                |                |                 |                 | N/A              |

SD, standard deviation; KO, knock-out; WT, wild-type; INHI, 11 $\beta$ -HSD1 inhibitor; veh, vehicle; N/A, not applicable.

**Table S4.** *p*-values of the *post hoc* analysis presented in Figure 6a (cholesterol).

|                          | Mean $\pm$<br>SD | KO aged<br>veh | WT aged<br>veh | WT aged<br>INHI | WT young<br>veh | WT young<br>INHI |
|--------------------------|------------------|----------------|----------------|-----------------|-----------------|------------------|
| <b>KO aged<br/>veh</b>   | 48.21 $\pm$ 4.83 | N/A            | 0.639          | 0.048           | 0.005           | 0.003            |
| <b>WT aged<br/>veh</b>   | 49.72 $\pm$ 3.20 |                | N/A            | 0.095           | 0.016           | 0.008            |
| <b>WT aged<br/>INHI</b>  | 56.71 $\pm$ 5.58 |                |                | N/A             | 0.310           | 0.016            |
| <b>WT young<br/>veh</b>  | 60.16 $\pm$ 5.50 |                |                |                 | N/A             | 0.056            |
| <b>WT young<br/>INHI</b> | 67.67 $\pm$ 4.88 |                |                |                 |                 | N/A              |

SD, standard deviation; KO, knock-out; WT, wild-type; INHI, 11 $\beta$ -HSD1 inhibitor; veh, vehicle; N/A, not applicable.

**Table S5.** *p*-values of the *post hoc* analysis presented in Figure 6a (total fatty acids).

|                          | Mean $\pm$<br>SD | KO aged<br>veh | WT aged<br>veh | WT aged<br>INHI | WT young<br>veh | WT young<br>INHI |
|--------------------------|------------------|----------------|----------------|-----------------|-----------------|------------------|
| <b>KO aged<br/>veh</b>   | 48.21 $\pm$ 4.83 | N/A            | 0.073          | 0.003           | 0.003           | 0.003            |
| <b>WT aged<br/>veh</b>   | 49.72 $\pm$ 3.20 |                | N/A            | 0.008           | 0.008           | 0.008            |
| <b>WT aged<br/>INHI</b>  | 56.71 $\pm$ 5.58 |                |                | N/A             | >0.999          | 0.421            |
| <b>WT young<br/>veh</b>  | 60.16 $\pm$ 5.50 |                |                |                 | N/A             | 0.310            |
| <b>WT young<br/>INHI</b> | 67.67 $\pm$ 4.88 |                |                |                 |                 | N/A              |

SD, standard deviation; KO, knock-out; WT, wild-type; INHI, 11 $\beta$ -HSD1 inhibitor; veh, vehicle; N/A, not applicable.
